# Supplementary material for: Low pH hydrothermal synthesis and properties of lanthanide-organic frameworks with (410,65)(49,66) topology constructed from Ln-Hbptc building blocks
Source: Royal Society of Chemistry journal article supplement (doi:10.1039/b709199k), 2007-01-01
Supplement: b709199k.pdf [file b709199k.pdf]

Electronic Supplementary Information for Dalton Transactions

This journal is © The Royal Society of Chemistry 2007

## Supporting Information

**Low pH hydrothermal synthesis and properties of lanthanide-organic frameworks with (4<sup>10</sup>,6<sup>5</sup>)(4<sup>9</sup>,6<sup>6</sup>) topology constructed from Ln-Hbptc building block**

Danfeng Weng,<sup>a</sup> Xiangjun Zheng,<sup>\*a</sup> Licun Li,<sup>b</sup> Wenwen Yang<sup>a</sup> and Linpei Jin<sup>\*a</sup>

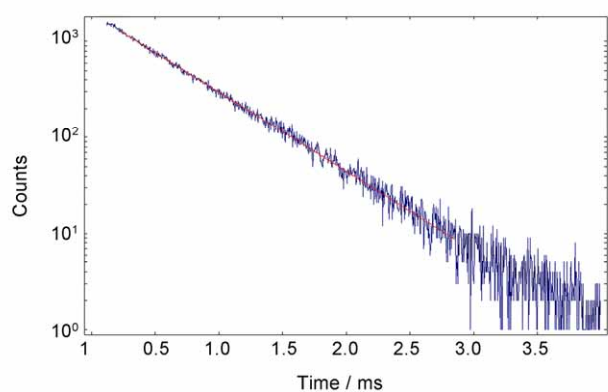

S 1 <sup>5</sup>D<sub>0</sub> decay curve detected at 615 nm.

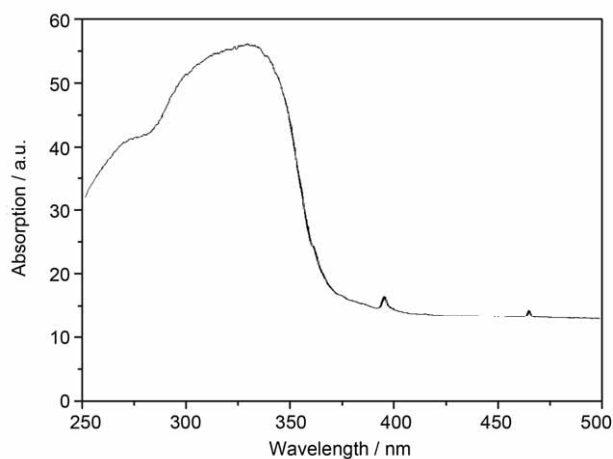

S 2 Absorption spectrum of the Eu<sup>III</sup> complex in solid state.

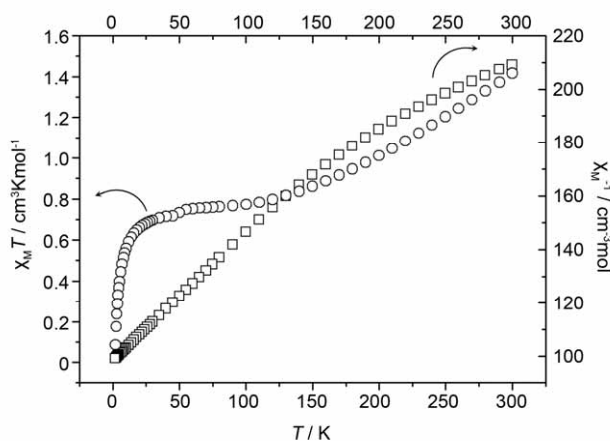

S 3 Temperature dependence of  $\chi_M T$  (○) and  $\chi_M^{-1}$  (□) of complex 1.

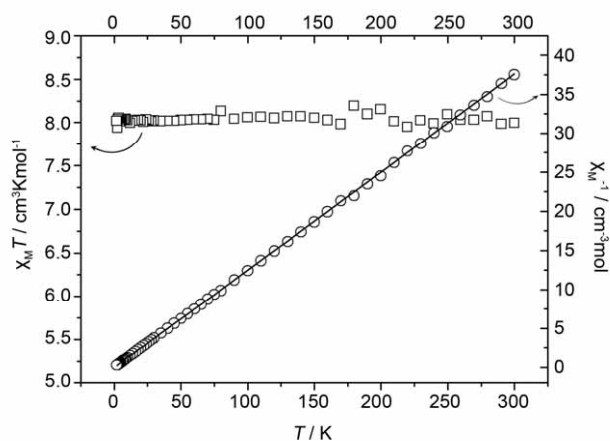

S 4 Temperature dependence of the  $\chi_M T$  (□) and  $\chi_M^{-1}$  (○) of complex 2. The solid line is the best-fit curve.
